# Supplementary material for: ESMPE: A combined strategy for school tuberculosis prevention and control proposed by Dalian, China
Source: PubMed Central journal article supplement (PMC5626428; doi:10.1371/journal.pone.0185646), 2017-10-03
Supplement: pone.0185646.s001.pdf [file pone.0185646.s001.pdf]

**Fig.2 Trend of TB incidence of five high-risk schools from 2011 to 2016 (Initial Data)**

| <b>School</b> | <b>Year</b> | <b>Number of Students in School</b> | <b>Number of TB Students</b> |
|---------------|-------------|-------------------------------------|------------------------------|
| School A      | 2011        | 11328                               | 8                            |
|               | 2012        | 11308                               | 9                            |
|               | 2013        | 12111                               | 15                           |
|               | 2014        | 11170                               | 47                           |
|               | 2015        | 11292                               | 42                           |
|               | 2016        | 11062                               | 14                           |
| School B      | 2011        | 17925                               | 8                            |
|               | 2012        | 19617                               | 12                           |
|               | 2013        | 20133                               | 20                           |
|               | 2014        | 16664                               | 24                           |
|               | 2015        | 18302                               | 8                            |
|               | 2016        | 19017                               | 6                            |
| School C      | 2011        | 17118                               | 29                           |
|               | 2012        | 16507                               | 16                           |
|               | 2013        | 17087                               | 29                           |
|               | 2014        | 14564                               | 25                           |
|               | 2015        | 16423                               | 10                           |
|               | 2016        | 18121                               | 7                            |
| School D      | 2011        | 13000                               | 9                            |
|               | 2012        | 14000                               | 11                           |
|               | 2013        | 14408                               | 17                           |
|               | 2014        | 12931                               | 28                           |
|               | 2015        | 13846                               | 19                           |
|               | 2016        | 14000                               | 17                           |
| School E      | 2011        | 11834                               | 3                            |
|               | 2012        | 11841                               | 8                            |
|               | 2013        | 11797                               | 12                           |
|               | 2014        | 14920                               | 23                           |
|               | 2015        | 15036                               | 20                           |
|               | 2016        | 16225                               | 18                           |
