# Supplementary material for: ESMPE: A combined strategy for school tuberculosis prevention and control proposed by Dalian, China
Source: PubMed Central journal article supplement (PMC5626428; doi:10.1371/journal.pone.0185646), 2017-10-03
Supplement: pone.0185646.s002.pdf [file pone.0185646.s002.pdf]

**Fig.4 The overall incidence of TB and the incidence of student TB in Dalian from 2011 to 2016 (Initial Data)**

| <b>Year</b> | <b>Population (×100000)</b> | <b>TB Patients</b> | <b>Number of Students</b> | <b>Number of TB students</b> |
|-------------|-----------------------------|--------------------|---------------------------|------------------------------|
| 2011        | 588.5                       | 4049               | 937053                    | 352                          |
| 2012        | 590.3                       | 3863               | 987100                    | 312                          |
| 2013        | 591.4                       | 3807               | 934064                    | 298                          |
| 2014        | 594.3                       | 3847               | 948269                    | 264                          |
| 2015        | 593.6                       | 3847               | 957643                    | 260                          |
| 2016        | 595.1                       | 3848               | 968858                    | 252                          |
